# Supplementary material for: Glutamic acid supplementation reduces body fat weight in finishing pigs when provided solely or in combination with arginine and it is associated with colonic propionate and butyrate concentrations
Source: Royal Society of Chemistry journal article supplement (doi:10.1039/c9fo00520j), 2019-01-01
Supplement: c9fo00520j1.pdf [file c9fo00520j1.pdf]

**Supplemental Table 1.** Mean count of raw sequences among the 5 intervention groups

| Items                  | BD group | IS group | Arg<br>group | Glu group | Arg_Glu<br>group |
|------------------------|----------|----------|--------------|-----------|------------------|
| Effective<br>sequences | 45,905   | 45,278.5 | 37,006       | 39,023    | 39,717           |

**Supplemental Table 2.** Composition and nutrient levels of the experimental diets<sup>a</sup> (as-fed basis)

| Ingredient, %       | BD group | IS group | Arg group | Glu group | Arg_Glu group |
|---------------------|----------|----------|-----------|-----------|---------------|
| Corn                | 76.3     | 76.3     | 76.3      | 76.3      | 76.3          |
| Soybean meal        | 16.5     | 16.5     | 16.5      | 16.5      | 16.5          |
| Soybean oil         | 0.56     | 0.56     | 0.56      | 0.56      | 0.56          |
| Corn starch         | 2.44     | 0.39     | 1.44      | —         | 0.44          |
| CaHPO <sub>4</sub>  | 0.65     | 0.65     | 0.65      | 0.65      | 0.65          |
| Calcium carbonate   | 1.08     | 1.08     | 1.08      | 1.08      | 1.08          |
| Salt                | 0.43     | 0.43     | 0.43      | 0.43      | 0.43          |
| Lys                 | 0.16     | 0.16     | 0.16      | 0.16      | 0.16          |
| Thr                 | 0.08     | 0.08     | 0.08      | 0.08      | 0.08          |
| Trp                 | 0.05     | 0.05     | 0.05      | 0.05      | 0.05          |
| Ala                 | —        | 2.05     | —         | 1.44      | —             |
| Arg                 | —        | —        | 1.00      | —         | 1.00          |
| Glu                 | —        | —        | —         | 1.00      | 1.00          |
| Leu                 | —        | —        | —         | —         | —             |
| Premix <sup>b</sup> | 1.75     | 1.75     | 1.75      | 1.75      | 1.75          |

<sup>a</sup>IS group = basal diet supplemented with 2.05% Ala; Arg group = basal diet supplemented with 1.00% Arg; Glu group = basal diet supplemented with 1.00% Glu+1.44% Ala; and Arg\_Glu group = basal diet supplemented with 1.00% Arg+1.00% Glu.

<sup>b</sup>Premix provided for 1 kg of complete diet: Cu as copper sulfate, 10 mg; Fe as iron sulfate, 100 mg; Se as sodium selenite, 0.30 mg; Zn as zinc oxide, 100 mg; Mn as manganese oxide, 10 mg; vitamin D<sub>3</sub>, 386 IU; vitamin A as retinyl acetate, 3 086 IU; vitamin E as D- $\alpha$ -tocopherol, 15.4 IU; vitamin K as menadione sodium bisulfate, 2.3 mg; vitamin B<sub>2</sub>, 3.9 mg; calcium pantothenate, 15.4 mg; niacin, 23 mg; and vitamin B<sub>12</sub>, 15.4 mg.

**Supplemental Table 3.** Nutrient levels of the experimental diets<sup>a</sup>

| Ingredient, %                           | BD group | IS group | Arg group | Glu group | Arg_Glu group |
|-----------------------------------------|----------|----------|-----------|-----------|---------------|
| Digestive energy, MJ/kg                 | 14.26    | 14.17    | 14.21     | 14.15     | 14.18         |
| Crude protein (CP), %                   | 13.04    | 14.88    | 14.88     | 14.88     | 15.31         |
| Crude fiber (CF), %                     | 2.42     | 2.42     | 2.42      | 2.42      | 2.42          |
| Crude fat, %                            | 5.94     | 5.94     | 5.94      | 5.94      | 5.94          |
| Calcium, %                              | 0.62     | 0.62     | 0.62      | 0.62      | 0.62          |
| Total phosphorus, %                     | 0.42     | 0.42     | 0.42      | 0.42      | 0.42          |
| Available phosphorus (AP), %            | 0.2      | 0.2      | 0.2       | 0.2       | 0.2           |
| Amino acid Composition <sup>a</sup> , % |          |          |           |           |               |
| Asp + Asn                               | 1.73     | 1.73     | 1.73      | 1.73      | 1.73          |
| Thr                                     | 0.79     | 0.79     | 0.79      | 0.79      | 0.79          |
| Ser                                     | 0.8      | 0.8      | 0.8       | 0.8       | 0.8           |
| Glu + Gln                               | 3.06     | 3.06     | 3.06      | 4.04      | 4.04          |
| Gly                                     | 0.95     | 0.95     | 0.95      | 0.95      | 0.95          |
| Ala                                     | 1.09     | 3.14     | 1.09      | 1.09      | 1.09          |
| Val                                     | 0.83     | 0.83     | 0.83      | 0.83      | 0.83          |
| Met                                     | 0.24     | 0.24     | 0.24      | 0.24      | 0.24          |
| Ile                                     | 0.79     | 0.79     | 0.79      | 0.79      | 0.79          |
| Leu                                     | 1.5      | 1.5      | 1.5       | 1.5       | 1.5           |
| Tyr                                     | 0.48     | 0.48     | 0.48      | 0.48      | 0.48          |
| Trp                                     | 0.16     | 0.16     | 0.16      | 0.16      | 0.16          |
| Phe                                     | 0.77     | 0.77     | 0.77      | 0.77      | 0.77          |
| His                                     | 0.62     | 0.62     | 0.62      | 0.62      | 0.62          |
| Lys                                     | 0.85     | 0.85     | 0.85      | 0.85      | 0.85          |
| Arg                                     | 1.01     | 1.01     | 2.01      | 1.01      | 2.01          |
| Pro                                     | 1.56     | 1.56     | 1.56      | 1.56      | 1.56          |
| Cys                                     | 0.28     | 0.28     | 0.28      | 0.28      | 0.28          |

<sup>a</sup>Analyzed values in the basal diet group, and nutrient contents in the other groups were calculated according to their contents in the basal diet group.
